# Between-centre differences for COVID-19 ICU mortality from early data in England

Zhaozhi Qian<sup>1</sup>, Ahmed M. Alaa<sup>2</sup>, Mihaela van der Schaar<sup>1</sup>, and Ari Ercole<sup>3,\*</sup>

<sup>1</sup>University of Cambridge Centre for Mathematical Sciences, Wilberforce Rd, Cambridge CB3 0WA, UK

<sup>2</sup>University of California, Los Angeles, CA 90095, USA

<sup>3</sup>University of Cambridge Division of Anaesthesia, Addenbrooke's Hospital, Hills Road, Cambridge CB2 0QQ, UK

\*Correspondence: [ae105@cam.ac.uk](mailto:ae105@cam.ac.uk)

*The high numbers of COVID-19 patients developing severe respiratory failure has placed exceptional demands on ICU capacity around the world. Understanding the determinants of ICU mortality is important for surge planning and shared decision making. We used early data from the COVID-19 Hospitalisation in England Surveillance System (from the start of data collection 8<sup>th</sup> February -14<sup>th</sup> April 2020) to look for factors associated with ICU outcome in the hope that information from such timely analysis may be actionable before the outbreak peak. Immunosuppression, chronic renal disease and age were key determinants of ICU mortality in a proportional hazards mixed effects model. However variation in site-stratified random effects were even more appreciable, suggesting substantial between-centre variability in mortality. Notwithstanding possible ascertainment and lead-time effects, these early results motivate comparative effectiveness research to understand the origin of such differences and optimise surge ICU provision.*

## Introduction

Since the first cases emerged in November 2019 [1], the spread of SARS-CoV-2 infections has placed an unprecedented strain on healthcare resources globally. The intensive care unit (ICU) is a setting of particular concern as high numbers of patients developing severe respiratory complications from COVID-19 means that advanced outcome-critical resources may be rapidly exhausted. Indeed, in some areas, ICUs have been completely overwhelmed [2].

Understanding the determinants of ICU outcome is crucial both for surge planning and shared decision making with patients and relatives. Whilst a number of risk scores have been published [3] they do not specifically look at this population. Furthermore, ICU availability, admission policy and structure varies substantially across Europe [4] as do population demographics and government policy for surveillance and containment. As a result, it is likely that ICU outcomes could vary significantly from region to region which motivates an individualised approach to modelling. The UK, where cases are still rising, is of particular concern as recent reports suggest mortality may prove be particularly high. To this end, we sought to identify predictors of mortality in patients admitted to the ICU with COVID-19.

## Data and analysis

We obtained de-identified COVID-19 Hospitalisation in England Surveillance System (CHESS) data from Public Health England (PHE) for the period from 8<sup>th</sup> February (data collection start) to 14<sup>th</sup> April 2020 (3,092 cases ICU cases– 609 deaths, 384 discharges from 94 NHS trusts across England).

We used a Cox proportional hazards mixed-effects model for mortality, with the NHS trust as the random effect. Predictors were normalised. The estimated coefficients associated with each predictor are shown in Figure 1.

## Discussion and conclusions

Immunosuppression, chronic renal disease and age were key predictors of mortality. In comparison with these fixed effects, the magnitude of the between-centre variation (log hazard ratio varying between -2 to +2) is greater even the strongest fixed effects predictors. The cause of such between-centre variation is unclear and may have a variety of case-mix, severity or structural explanations. In particular, ICU demand varies both regionally and locally and we may hypothesize that high levels of strain or constraints on surge capacity could be actionable determinants, although we do not have data to examine this. Such considerations are important to understand as they may influence optimal configuration or transfer considerations locally.

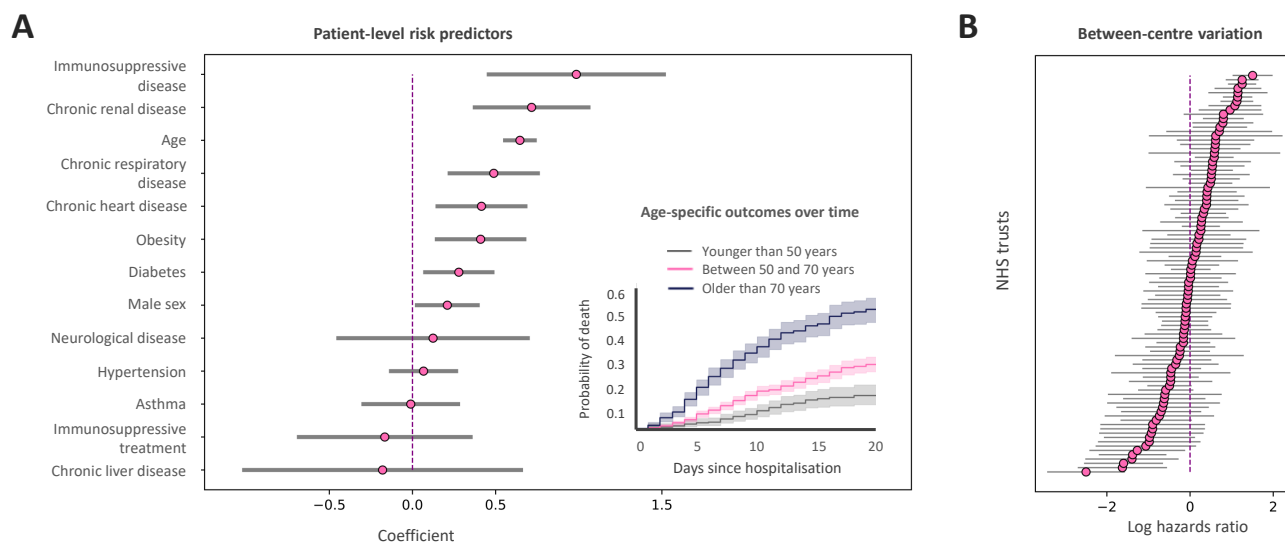

Figure 1: **Panel (A)** Fixed effects (log hazard ratio) estimates for CHES predictors. The inset shows mortality probability over time for young, intermediate and older age groups. **Panel (B)** random effects (log hazard ratio) showing between centres variation. (95% CIs).

In an attempt to create an analysis on a timescale which is actionable, we have built this model on early data which inevitably suffers from incomplete ascertainment, particularly before approx 15<sup>th</sup> March 2020. Furthermore the earlier deaths in the elderly group may result in some lead time bias due to censoring and we cannot track outcomes on patients who are transferred. Nevertheless, the magnitude of the random effects is striking. This motivates urgent comparative effectiveness research to better characterise between-centre differences in outcome which may inform best practice in surge situations both in England and elsewhere.

## Acknowledgements

We would like to acknowledge Public Health England for providing us access to the CHES dataset. In particular, we would like to acknowledge Anees Pari and Geraldine Linehan for their support.

## Availability of data and materials statement

Source data controlled by Public Health England. Under the terms of our data sharing agreement, the authors are not able to re-share the source data but will entertain requests for scientific collaboration.

## Competing interests

None to declare.

## Funding

Not externally funded.

## Authors' contributions

AE and MvdS conceived of and supervised the study. ZQ and AMA coded the statistical models. All authors contributed to the manuscript.

## References

- [1] Wu J, Liu J, Zhao X, Liu C, Wang W, Wang D, Xu W, Zhang C, Yu J, Jiang B, Cao H, and Li L (2020). Clinical Characteristics of Imported Cases of COVID-19 in Jiangsu Province: A Multicenter Descriptive Study. *Clin Infect Dis* doi:10.1093/cid/ciaa199.
- [2] Grasselli G, Zangrillo A, Zanella A, Antonelli M, Cabrini L, Castelli A, Cereda D, Coluccello A, Foti G, Fumagalli R, Iotti G, Latronico N, Lorini L, Merler S, Natalini G, Piatti A, Ranieri MV, Scandroglio AM, Storti E, Cecconi M, and Pesenti A (2020). Baseline Characteristics and Outcomes of 1591 Patients Infected With SARS-CoV-2 Admitted to ICUs of the Lombardy Region, Italy. *JAMA* doi:10.1001/jama.2020.5394.
- [3] Wynants L, Van Calster B, Bonten MMJ, Collins GS, Debray TPA, De Vos M, Haller MC, Heinze G, Moons KGM, Riley RD, Schuit E, Smits LJM, Snell KIE, Steyerberg EW, Wallisch C, and van Smeden M (2020). Prediction models for diagnosis and prognosis of covid-19 infection: systematic review and critical appraisal. *BMJ* 369:m1328.
- [4] Rhodes A, Ferdinande P, Flaatten H, Guidet B, Metnitz PG, and Moreno RP (2012). The variability of critical care bed numbers in Europe. *Intensive Care Med* 38:1647–1653.
